# Supplementary figures and images for: Understanding the combinatorial action of transcription factors and microRNA regulation from regions of open chromatin
Source: Royal Society of Chemistry journal article supplement (doi:10.1039/c5mb00702j), 2015-12-14

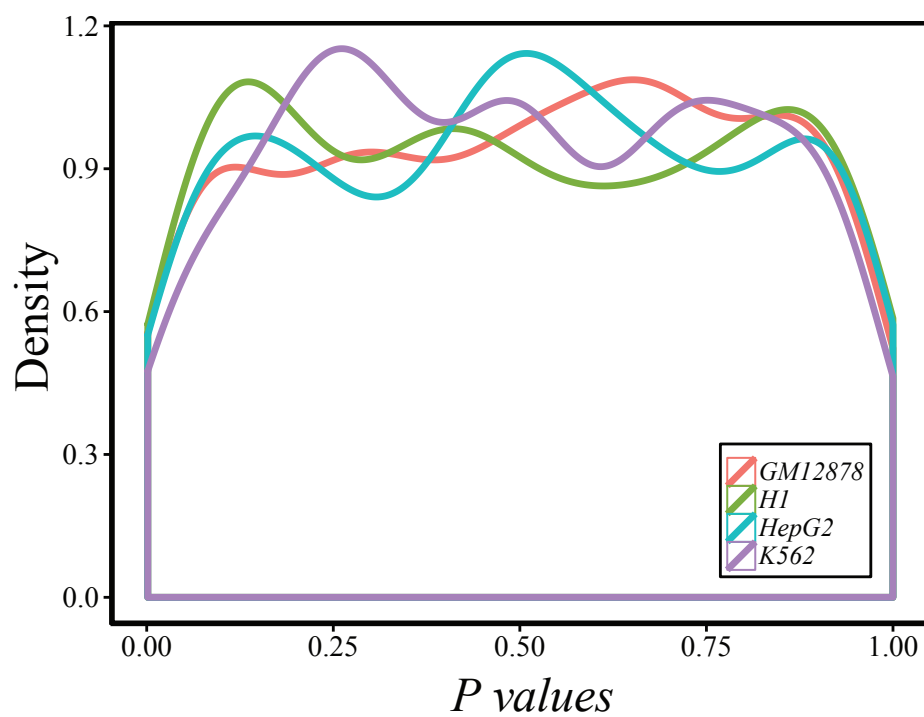

Supplement: c5mb00702j2.pdf [file c5mb00702j2.pdf]
